# Supplementary material
Source: PubMed Central journal article supplement (PMC5115342)
Supplement: ADVS-2-0h-s001.pdf [file ADVS-2-0h-s001.pdf]

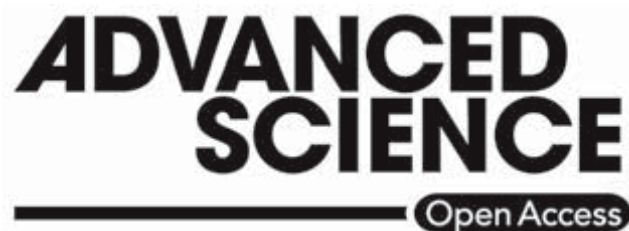

## Supporting Information

for *Adv. Sci.*, DOI: 10.1002/advs. 201500176

A Biomineralization Strategy for “Net”-Like Interconnected  
TiO<sub>2</sub> Nanoparticles Conformably Covering Reduced Graphene  
Oxide with Reversible Interfacial Lithium Storage

*Qiang Zhang, Yong Yan, and Ge Chen\**

## Supporting Information

### Title

Bio-mineralization Strategy toward “Net”-like Interconnected TiO<sub>2</sub> Nanoparticles  
Conformably Covering Reduced Graphene Oxide with Reversible Interfacial Lithium Storage

*Qiang Zhang, Yong Yan<sup>‡</sup> and Ge Chen\**

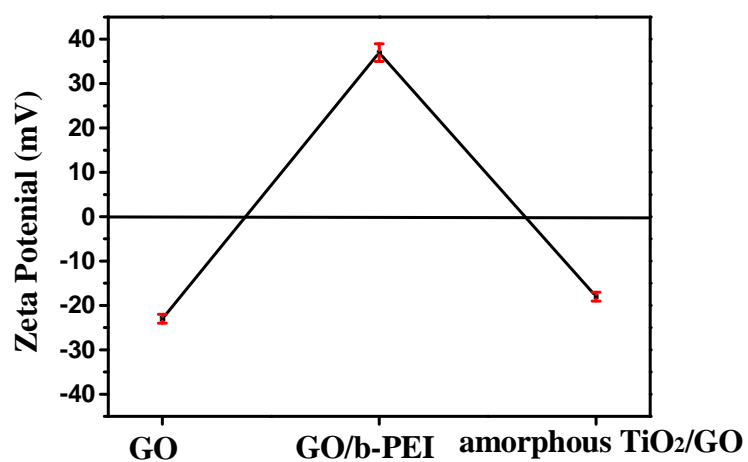

**Figure S1.** Zeta potentials of GO, GO/b-PEI, and amorphous TiO<sub>2</sub>/GO composites.

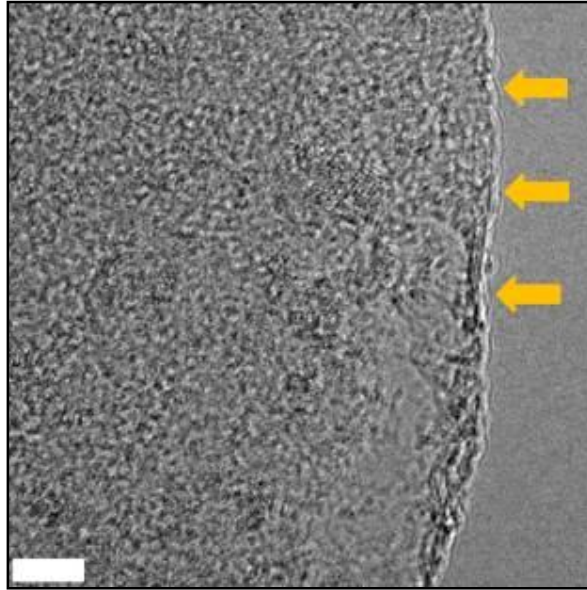

**Figure S2.** HRTEM image of amorphous TiO<sub>2</sub>/GO composite; the edge of GO marked by the orange arrow indicates the ultrathin nature (3–4 layers), bar 5 nm.

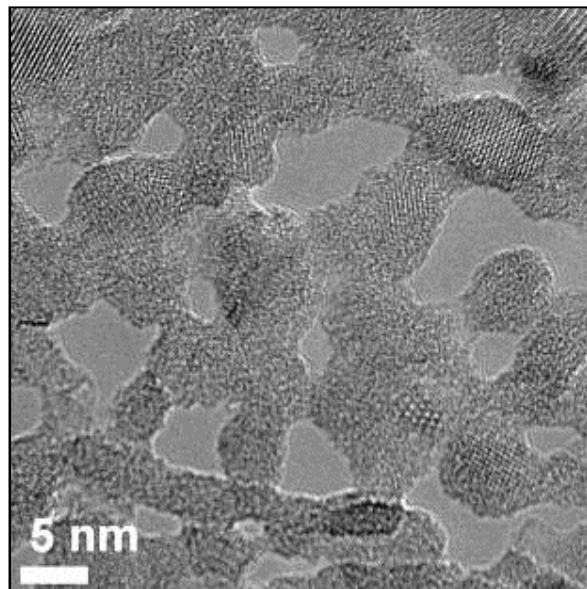

**Figure S3.** HRTEM image of anatase TiO<sub>2</sub>/RGO composite, indicating the “net”-like structure of TiO<sub>2</sub> conformably covering RGO, bar 5 nm.

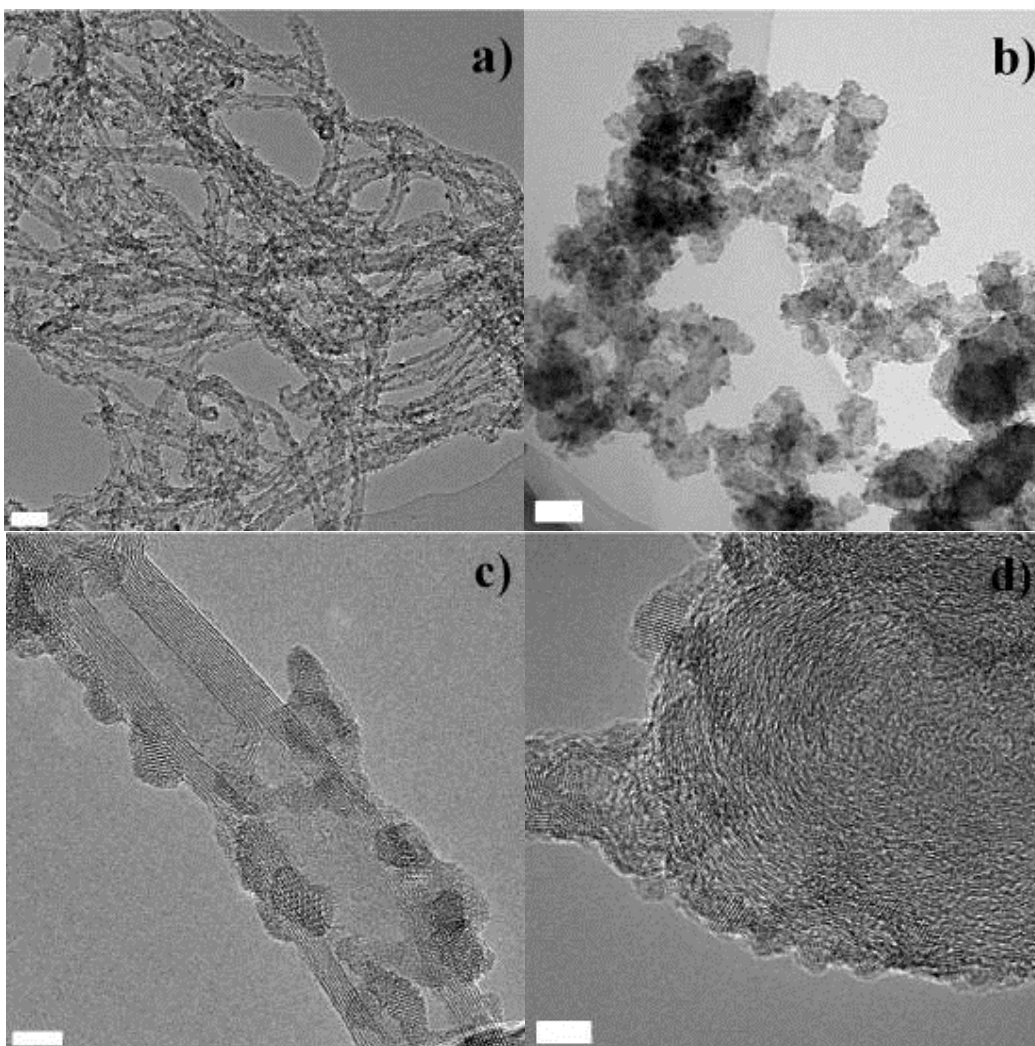

**Figure S4.** a) TEM image of anatase TiO<sub>2</sub>/CNTs, bar 50 nm. b) TEM image of anatase TiO<sub>2</sub>/carbon spheres (XC-72), bar 50 nm. c) HRTEM image of anatase TiO<sub>2</sub>/CNTs, bar 5 nm. d) HRTEM image of anatase TiO<sub>2</sub>/carbon spheres (XC-72), bar 5 nm.

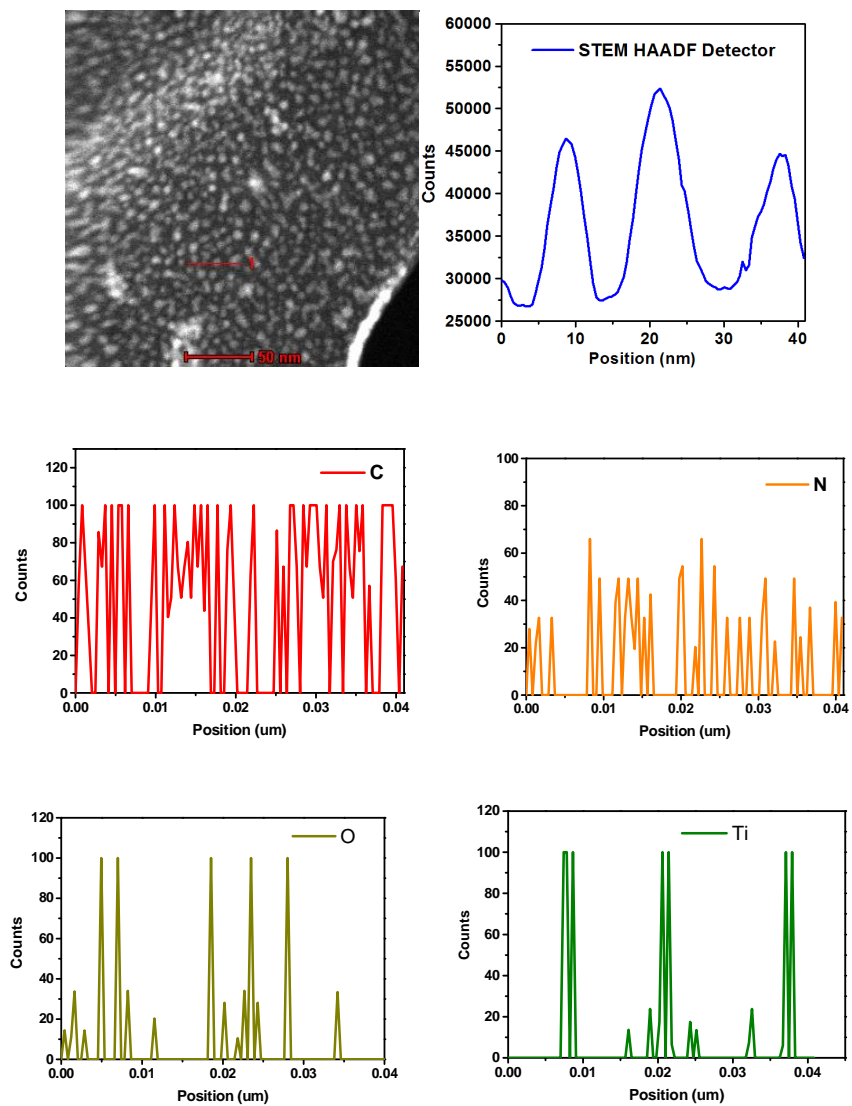

**Figure S5.** Energy-dispersive X-ray spectroscopy (EDS) line scan analysis based on the STEM-HAADF model demonstrating the distribution of C, N, O, and Ti species; while the Ti and O species are dispersed on the particles, the C and N species are dispersed along the line.

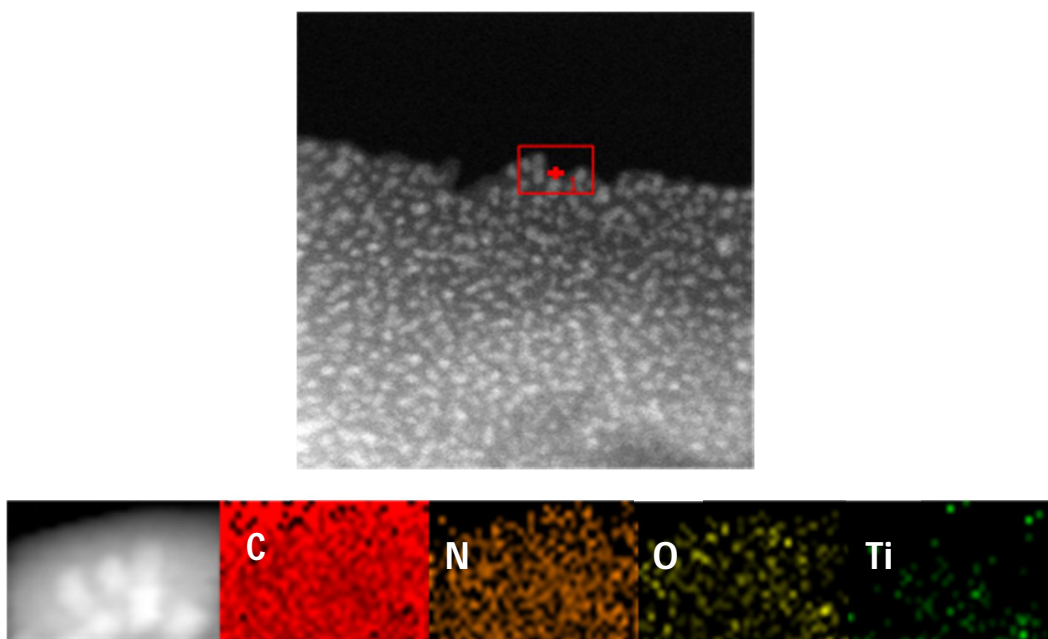

**Figure S6.** EDS elemental mapping of C, N, O, and Ti species for the anatase TiO<sub>2</sub>/RGO composite.

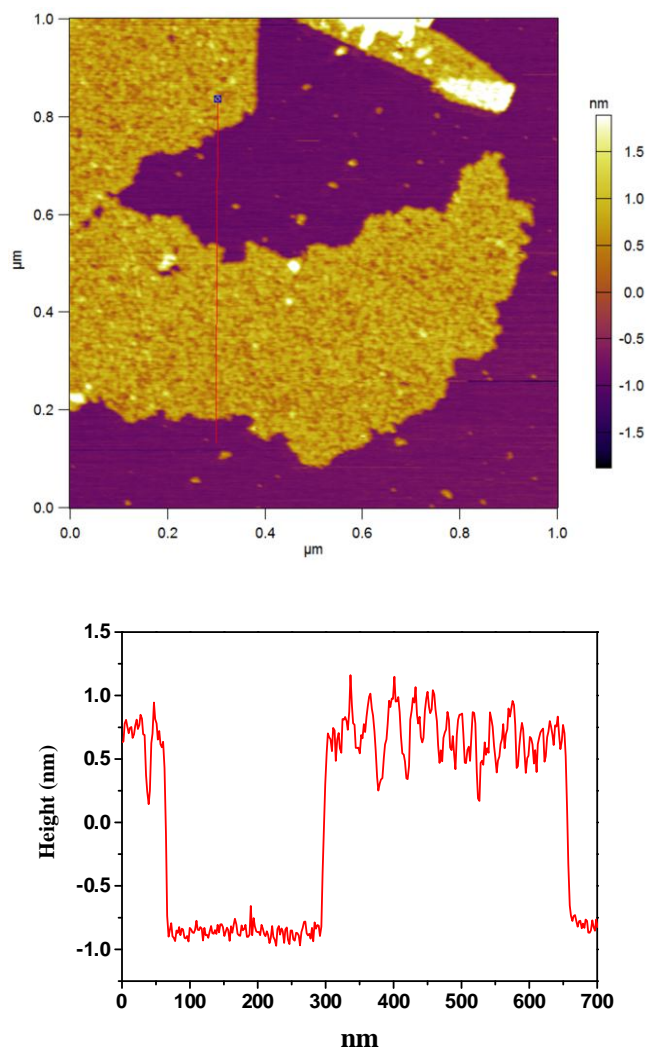

**Figure S7.** Topography image of GO on a mica substrate and the corresponding height-profile analysis along the line.

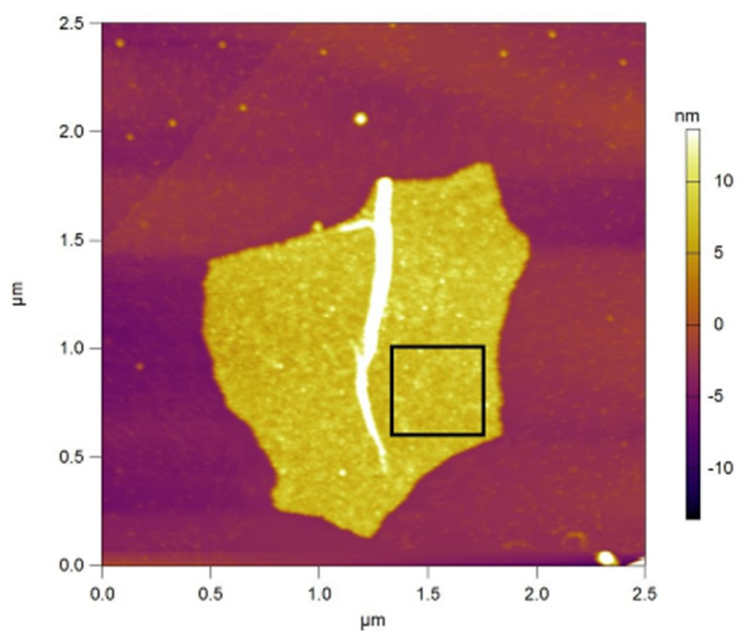

**Figure S8.** Topography image of anatase TiO<sub>2</sub>/RGO on the HOPG substrate; the black square region is ready for current image collecting.

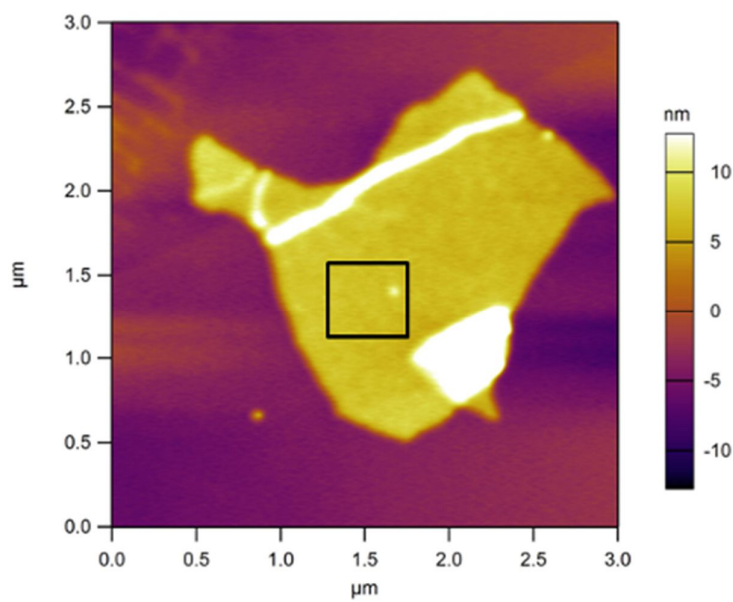

**Figure S9.** Topography image of amorphous TiO<sub>2</sub>/GO on the HOPG substrate; the black square region is ready for current image collecting.



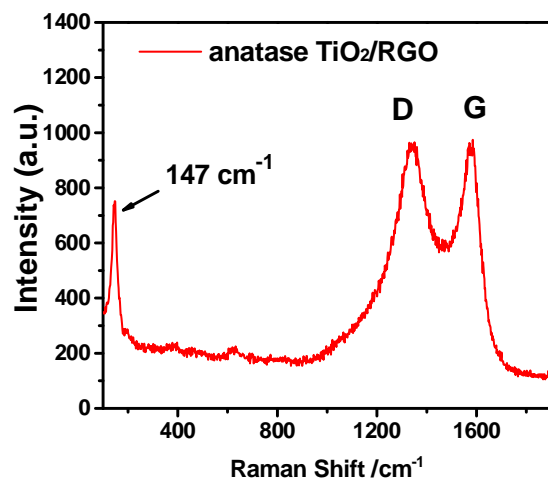

**Figure S10.** Raman spectrum of the anatase TiO<sub>2</sub>/RGO composite.

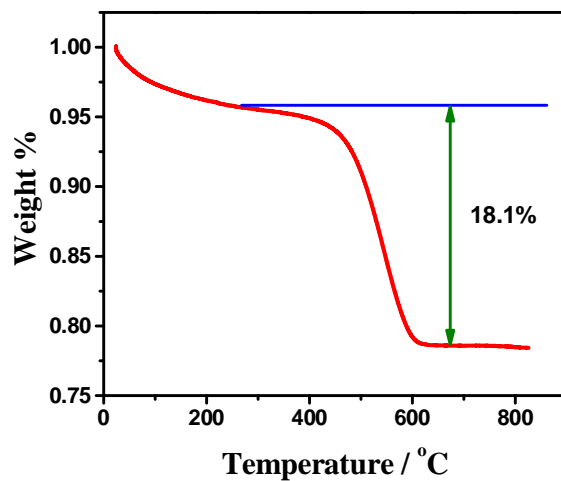

**Figure S11.** TGA analysis of the anatase TiO<sub>2</sub>/RGO composite in air.

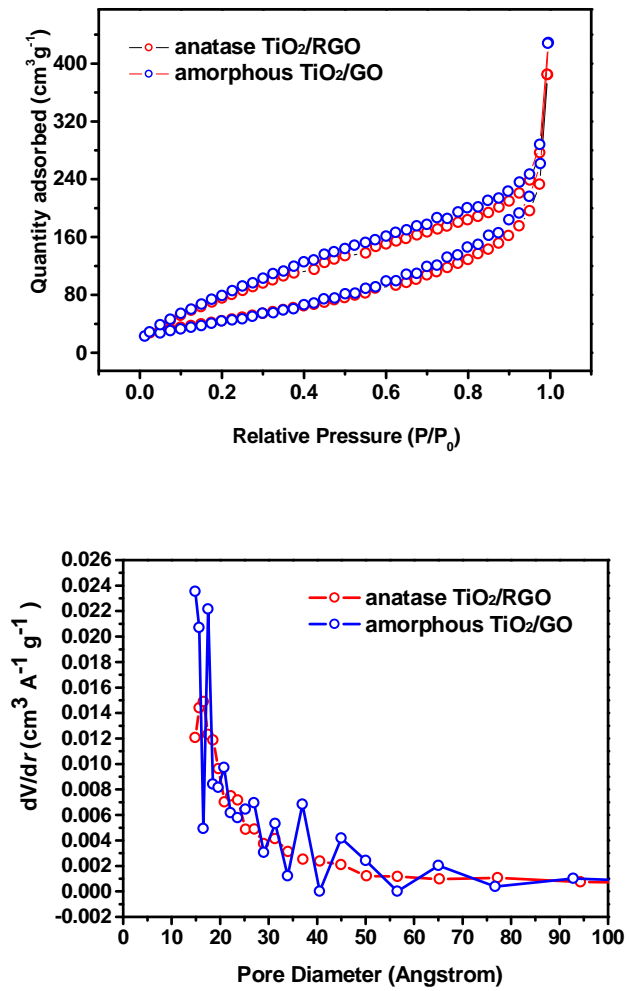

**Figure S12.**  $N_2$  adsorption/desorption isotherms of amorphous  $TiO_2/GO$  and anatase  $TiO_2/RGO$  composites and corresponding pore size distribution results analyzed by the BJH method.

**Table S1** Comparison of electrochemical performance of obtained anatase TiO<sub>2</sub>/RGO with other relative anodes materials.

| Materials                     | Discharge density | Capacity (mAh g <sup>-1</sup> ) | Cycle numbers | Reference     |
|-------------------------------|-------------------|---------------------------------|---------------|---------------|
| Anatase TiO <sub>2</sub> /RGO | 5C                | 151                             | 50            | Current study |
| Anatase TiO <sub>2</sub> -FGS | 1C                | 160                             | 100           | [9]           |
| TiO <sub>2</sub> -RGO         | 5C                | 175                             | 30            | [11]          |
| TiO <sub>2</sub> -RGO         | 5.9C              | 143                             | 35            | [16]          |
| TiO <sub>2</sub> /GAs         | 5.9C              | 130                             | 40            | [18]          |
| Graphene-TiO <sub>2</sub>     | 5C                | 130                             | 100           | [10]          |
| TiO <sub>2</sub> -RGO         | 5C                | 152                             | 100           | [71]          |
| TiO <sub>2</sub> –GNS –CNT    | 10C               | 111                             | 100           | [72]          |
| Graphene-TiO <sub>2</sub> -C  | 0.59C             | 95                              | 20            | [73]          |
